# Supplementary material for: A large role of missing volatile organic compound reactivity from anthropogenic emissions in ozone pollution regulation
Source: Copernicus journal article supplement (doi:10.5194/acp-24-4017-2024), 2024-04-04
Supplement: Supplementary file 1 [file acp-24-4017-2024-supplement.pdf]

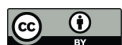

*Supplement of*

## **A large role of missing volatile organic compound reactivity from anthropogenic emissions in ozone pollution regulation**

**Wenjie Wang et al.**

*Correspondence to:* Wenjie Wang (wenjie.wang@mpic.de) and Bin Yuan (byuan@jnu.edu.cn)

The copyright of individual parts of the supplement might differ from the article licence.

21 **S1 The correction of NO interference on R<sub>OH</sub> measurements**

22 The NO-correction experiments were conducted by introducing given amounts of  
23 VOC standard gases into the reactor. Different levels of NO were injected into the  
24 reactor and the difference between “measured” R<sub>OH</sub> and true R<sub>OH</sub> increased as the NO  
25 concentration increased. Here, the difference between “measured” R<sub>OH</sub> and true R<sub>OH</sub> is  
26 defined as  $\delta R_{OH}$ . Then, a correction curve was fitted between the  $\delta R_{OH}$  and NO  
27 concentrations. Several standard gases (propene and PAMS mixture) and different  
28 levels of base reactivity (from 30 to 90 s<sup>-1</sup>) have been tried and the curve was quite  
29 consistent for all tested gases, as shown in Fig. S1. According to this correction curve  
30 and ambient NO concentrations, we calculated the  $\delta R_{OH}$  which was used to correct the  
31 measured R<sub>OH</sub>.

32

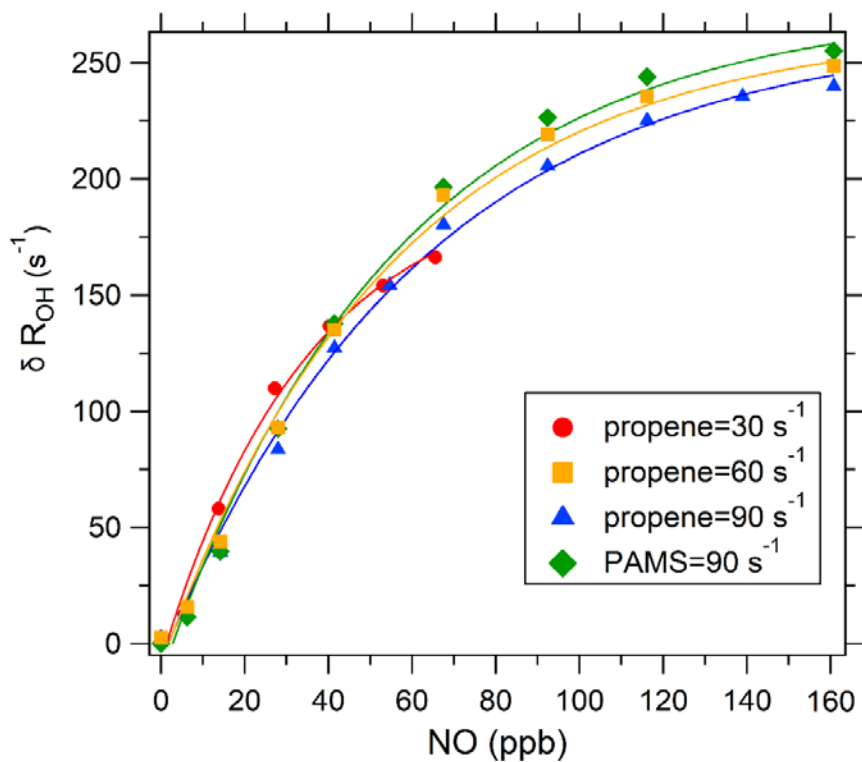

33

34 Figure S1. NO-correction experiments and fitting curves in Guangzhou in 2018 at  
 35 different  $R_{OH}$  of propene standard gas and mixture standard gas. The mixture standard  
 36 gas used is the mixture PAMS (photochemical assessment monitoring stations) of 56  
 37 non-methane hydrocarbons (NMHCs; SpecialGas Ltd, USA).

38

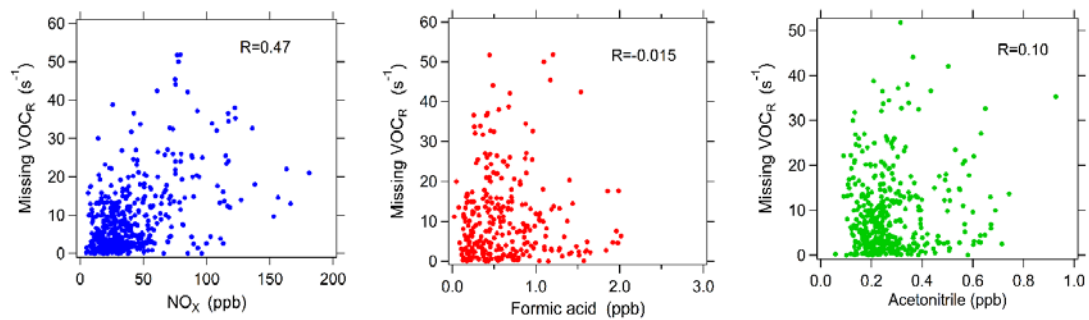

39

40 Figure S2. Correlation of missing VOC<sub>R</sub> with NO<sub>x</sub>, formic acid (HCOOH) and  
41 acetonitrile during the measurement in Guangzhou. Each point represents hourly data.

42

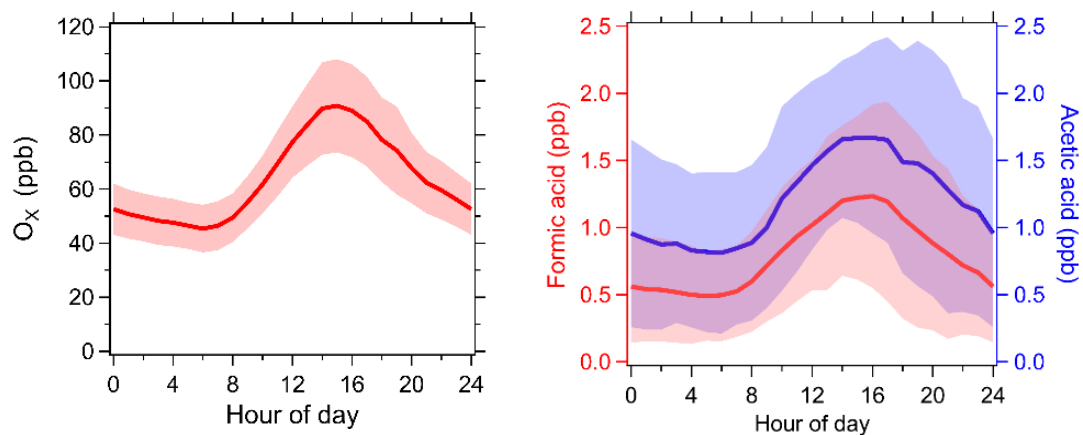

43

44

45 Figure S3. Diurnal variations in Ox, formic acid and acetic acid.

46

**Table S1. VOC species measured in this study**

| Classes  | VOC species                                                                                                                                                                                                                                                                                                                                                                                                                                   |
|----------|-----------------------------------------------------------------------------------------------------------------------------------------------------------------------------------------------------------------------------------------------------------------------------------------------------------------------------------------------------------------------------------------------------------------------------------------------|
| Alkane   | ethane, propane, isobutane, n-butane, cyclopentane, isopentane, n-pentane, 2,2-dimethylbutane, 2,3-dimethylbutane, 2-methylpentane, 3-methylpentane, n-hexane, 2,4-dimethylpentane, methylcyclopentane, 2-methylhexane, cyclohexane, 2,3-dimethylpentane, 3-Methylhexane, 2,2,4-trimethylpentane, n-heptane, methylcyclohexane, 2,3,4-trimethylpentane, 2-methylheptane, 3-methyl Heptane, octane, n-nonane, n-decane, n-undecane, n-dodecane |
| Alkene   | ethylene, propylene, trans-2-butene, 1-butene, cis-2-butene, 1,3-butadiene, 1-pentene, trans-2-pentene, isoprene, cis- 2-pentene, 1-hexene                                                                                                                                                                                                                                                                                                    |
| Aromatic | benzene, ethylbenzene, m/p-xylene, o-xylene, styrene, n-propylbenzene, 3-ethyltoluene, 4-ethyltoluene, 1,3,5-trimethyl Benzene, 2-ethyltoluene, 1,2,4-trimethylbenzene, 1,2,3-trimethylbenzene, 1,3-diethylbenzene, 1,4-diethylbenzene, toluene                                                                                                                                                                                               |

50 Table S2. The 31 VOCs which were calibrated using either gas or liquid standards. The  
 51 ion formula of these VOCs detected by PTR-ToF-MS and corresponding sensitivity are  
 52 provided.

| VOC species            | Ion formula                                                 | Sensitivity, cps/ppb |
|------------------------|-------------------------------------------------------------|----------------------|
| Formaldehyde           | CH <sub>2</sub> OH <sup>+</sup>                             | 1042                 |
| Methanol               | CH <sub>4</sub> OH <sup>+</sup>                             | 629.3                |
| Acetonitrile           | C <sub>2</sub> H <sub>3</sub> NH <sup>+</sup>               | 3374                 |
| Acetaldehyde           | C <sub>2</sub> H <sub>4</sub> OH <sup>+</sup>               | 2767                 |
| Ethanol                | C <sub>2</sub> H <sub>6</sub> OH <sup>+</sup>               | 99.23                |
| Acrolein               | C <sub>3</sub> H <sub>4</sub> OH <sup>+</sup>               | 4107                 |
| Acetone                | C <sub>3</sub> H <sub>6</sub> OH <sup>+</sup>               | 4299                 |
| Furan                  | C <sub>4</sub> H <sub>4</sub> OH <sup>+</sup>               | 2544                 |
| Isoprene               | C <sub>5</sub> H <sub>8</sub> H <sup>+</sup>                | 1888                 |
| MVK+MACR               | C <sub>4</sub> H <sub>6</sub> OH <sup>+</sup>               | 3868                 |
| MEK                    | C <sub>4</sub> H <sub>8</sub> OH <sup>+</sup>               | 4467                 |
| Benzene                | C <sub>6</sub> H <sub>6</sub> H <sup>+</sup>                | 3151                 |
| 2-Pentanone            | C <sub>5</sub> H <sub>10</sub> OH <sup>+</sup>              | 4510                 |
| Toluene                | C <sub>7</sub> H <sub>8</sub> H <sup>+</sup>                | 3978                 |
| Phenol                 | C <sub>6</sub> H <sub>6</sub> OH <sup>+</sup>               | 4076                 |
| Furfural               | C <sub>5</sub> H <sub>4</sub> O <sub>2</sub> H <sup>+</sup> | 7460                 |
| Methyl Isobutyl Ketone | C <sub>6</sub> H <sub>12</sub> OH <sup>+</sup>              | 3988                 |
| Styrene                | C <sub>8</sub> H <sub>8</sub> H <sup>+</sup>                | 4289                 |
| xylene                 | C <sub>8</sub> H <sub>10</sub> H <sup>+</sup>               | 4241                 |
| Cresol                 | C <sub>7</sub> H <sub>8</sub> OH <sup>+</sup>               | 4299                 |
| Trimethylbenzene       | C <sub>9</sub> H <sub>12</sub> H <sup>+</sup>               | 4413                 |
| Naphthalene            | C <sub>10</sub> H <sub>8</sub> H <sup>+</sup>               | 5117                 |
| a-Pinene               | C <sub>10</sub> H <sub>16</sub> H <sup>+</sup>              | 2332                 |
| Formic acid            | CH <sub>2</sub> O <sub>2</sub> H <sup>+</sup>               | 856.6                |
| Acetic acid            | C <sub>2</sub> H <sub>4</sub> O <sub>2</sub> H <sup>+</sup> | 1711                 |
| Propionic acid         | C <sub>3</sub> H <sub>6</sub> O <sub>2</sub> H <sup>+</sup> | 2072                 |
| Butyric acid           | C <sub>4</sub> H <sub>8</sub> O <sub>2</sub> H <sup>+</sup> | 2358                 |
| Pyrrole                | C <sub>4</sub> H <sub>5</sub> NH <sup>+</sup>               | 2842                 |
| Formamide              | CH <sub>3</sub> NOH <sup>+</sup>                            | 2871                 |
| Acetamide              | C <sub>2</sub> H <sub>5</sub> NOH <sup>+</sup>              | 3992                 |

53

54

Table S3. The units of variables used in this study.

| Variables              | Units             |
|------------------------|-------------------|
| $R_{OH}$               | $s^{-1}$          |
| $k_{OH+Xi}$            | $ppb^{-1} s^{-1}$ |
| $[X_i]$                | ppb               |
| $VOC_R$                | $s^{-1}$          |
| <i>Missing</i> $VOC_R$ | $s^{-1}$          |
| $C_{background}$       | $s^{-1}$          |
| $P(O_3)$               | $ppb h^{-1}$      |
| $L(O_3)$               | $ppb h^{-1}$      |
| $j(O^1D)$              | $s^{-1}$          |
| $L_N/Q$                | unitless          |

55

56
